# Supplementary material
Source: PubMed Central journal article supplement (PMC7553942)
Supplement: 41437_2020_350_MOESM1_ESM.pdf [file 41437_2020_350_MOESM1_ESM.pdf]

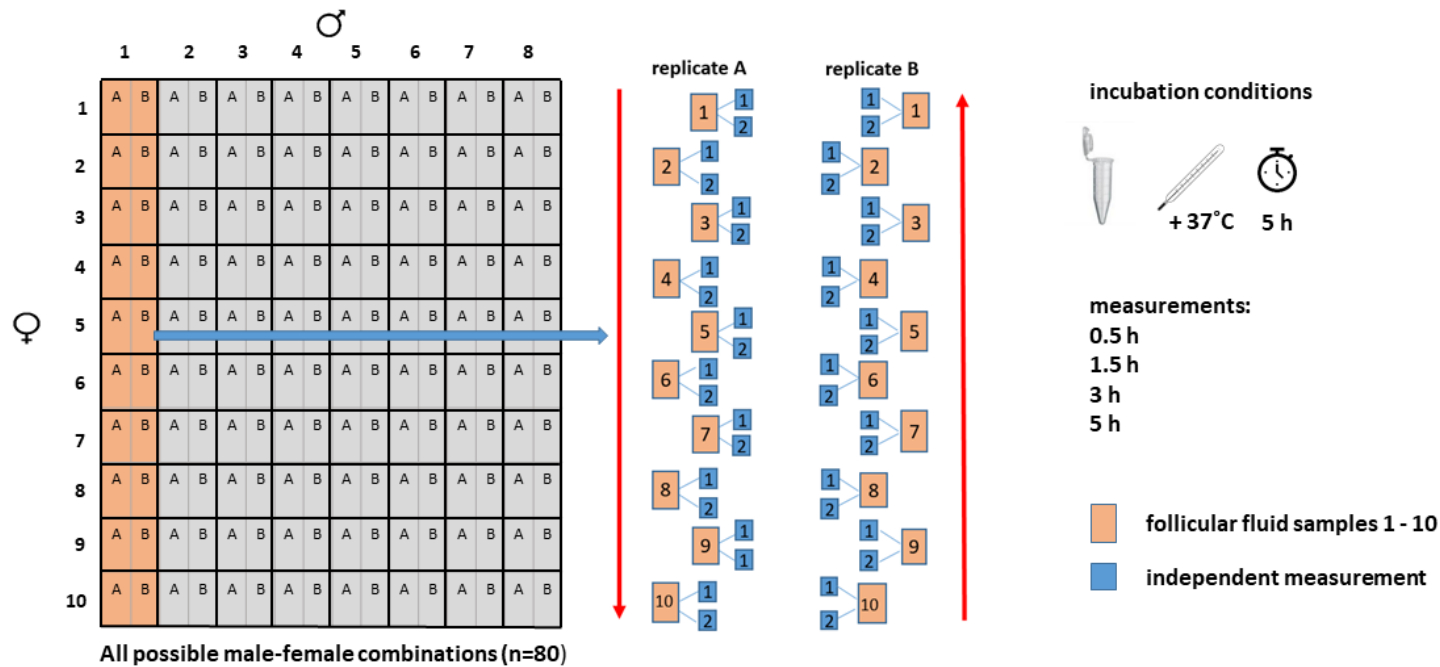

**Supplementary Figure 1.** Schematic illustration of the experimental design. The sperm of the eight males were incubated (+37°C) in the follicular fluid of 10 women (n = 80 independent male-female combinations) for five hours. Each of these male-female combinations consisted two replicate samples (A+B: orange boxes) and within both of these replicates we measured motility, acrosome reaction and viability of sperm in two independent sub-samples (1+2: blue boxes). Sperm motility was measured in four different time points (0.5, 1.5, 3 and 5 hours after the initiation of the follicular fluid treatment). Sperm acrosome reaction and viability were measured after the 5 h follicular fluid incubation. Red arrows show the order of the sperm measurements.

**Table S1.** Linear mixed model statistics for the effect of male, female and male-female interaction on sperm swimming velocity (VCL) in four different time points (30-300 min after the initiation of follicular fluid treatment).

| Effects      | 30 min   |       |                 |       | 90 min   |       |                 |       | 180 min  |        |                 |       | 300 min  |       |                 |       |
|--------------|----------|-------|-----------------|-------|----------|-------|-----------------|-------|----------|--------|-----------------|-------|----------|-------|-----------------|-------|
|              | $\chi^2$ | d.f.  | <i>P</i> -value | % var | $\chi^2$ | d.f.  | <i>P</i> -value | % var | $\chi^2$ | d.f.   | <i>P</i> -value | % var | $\chi^2$ | d.f.  | <i>P</i> -value | % var |
| Male         | 197.2    | 1     | < <b>0.001</b>  | 80.81 | 160.3    | 1     | < <b>0.001</b>  | 79.06 | 48.2     | 1      | < <b>0.001</b>  | 38.51 | 46.9     | 1     | < <b>0.001</b>  | 29.28 |
| Female       | 37.8     | 1     | < <b>0.001</b>  | 3.83  | 11.4     | 1     | < <b>0.001</b>  | 2.24  | 2.80     | 1      | 0.09            | 3.38  | 0.84     | 1     | 0.36            | 1.29  |
| M × F        | 0.03     | 1     | 0.87            | 0.1   | 1.57     | 1     | 0.21            | 1.21  | 37.4     | 1      | < <b>0.001</b>  | 15.75 | 23.3     | 1     | < <b>0.001</b>  | 11.14 |
| Residual     |          |       |                 | 11.50 |          |       |                 | 17.48 |          |        |                 | 30.68 |          |       |                 | 30.74 |
| <b>Fixed</b> | <i>t</i> | d.f.  | <i>P</i> -value | % var | <i>t</i> | d.f.  | <i>P</i> -value | % var | <i>t</i> | d.f.   | <i>P</i> -value | % var | <i>t</i> | d.f.  | <i>P</i> -value | % var |
| Intercept    | 20.52    | 7.581 | < <b>0.001</b>  |       | 25.66    | 7.39  | < <b>0.001</b>  |       | 31.48    | 8.14   | < <b>0.001</b>  |       | 24.80    | 7.775 | < <b>0.001</b>  |       |
| Replicate    | 10.30    | 239.0 | < <b>0.001</b>  | 3.8   | -0.33    | 239.0 | 0.75            | < 0.1 | -11.01   | -11.01 | < <b>0.001</b>  | 11.7  | -16.91   | 239.0 | < <b>0.001</b>  | 27.6  |

**Table S2.** Linear mixed model statistics for the effect of male, female and male-female interaction on sperm hyperactivation in four different time points (30-300 min after the initiation of follicular fluid treatment).

| Effects      | 30 min   |       |                 |       | 90 min   |       |                 |       | 180 min  |       |                 |       | 300 min  |       |                 |       |
|--------------|----------|-------|-----------------|-------|----------|-------|-----------------|-------|----------|-------|-----------------|-------|----------|-------|-----------------|-------|
|              | $\chi^2$ | d.f.  | <i>P</i> -value | % var | $\chi^2$ | d.f.  | <i>P</i> -value | % var | $\chi^2$ | d.f.  | <i>P</i> -value | % var | $\chi^2$ | d.f.  | <i>P</i> -value | % var |
| Male         | 161.9    | 1     | < <b>0.001</b>  | 70.66 | 98.7     | 1     | < <b>0.001</b>  | 56.83 | 27.9     | 1     | < <b>0.001</b>  | 24.16 | 42.6     | 1     | < <b>0.001</b>  | 24.90 |
| Female       | 32.2     | 1     | < <b>0.001</b>  | 4.88  | 4.90     | 1     | <b>0.03</b>     | 2.46  | 1.83     | 1     | 0.18            | 3.05  | 6.39     | 1     | <b>0.01</b>     | 4.52  |
| M × F        | 0.00     | 1     | 1.0             | 0.0   | 1.24     | 1     | 0.27            | 2.28  | 38.2     | 1     | < <b>0.001</b>  | 18.80 | 13.8     | 1     | < <b>0.001</b>  | 8.88  |
| Residual     |          |       |                 | 20.25 |          |       |                 | 37.43 |          |       |                 | 35.99 |          |       |                 | 35.11 |
| <b>Fixed</b> | <i>t</i> | d.f.  | <i>P</i> -value | % var | <i>t</i> | d.f.  | <i>P</i> -value | % var | <i>t</i> | d.f.  | <i>P</i> -value | % var | <i>t</i> | d.f.  | <i>P</i> -value | % var |
| Intercept    | 10.33    | 7.87  | < <b>0.001</b>  |       | 15.85    | 7.70  | < <b>0.001</b>  |       | 14.83    | 8.58  | < <b>0.001</b>  |       | 7.80     | 9.26  | < <b>0.001</b>  |       |
| Replicate    | 8.15     | 302.0 | < <b>0.001</b>  | 4.2   | -2.92    | 239.0 | <b>0.004</b>    | 1.0   | -12.63   | 239.0 | < <b>0.001</b>  | 18.0  | -15.54   | 239.0 | < <b>0.001</b>  | 26.6  |
